# Supplementary material for: PITAR, a DNA damage-inducible cancer/testis long noncoding RNA, inactivates p53 by binding and stabilizing TRIM28 mRNA
Source: eLife journal article supplement (doi:10.7554/elife.88256), 2023-07-03

**Figure 4J:**

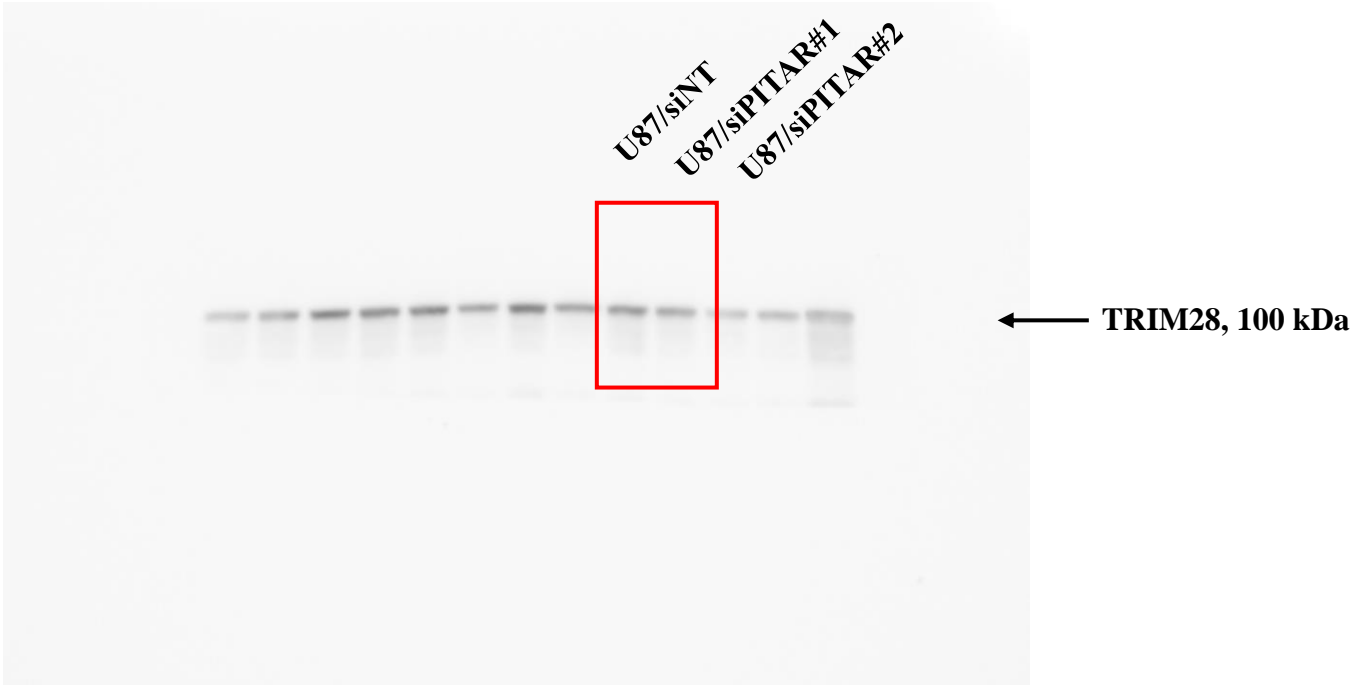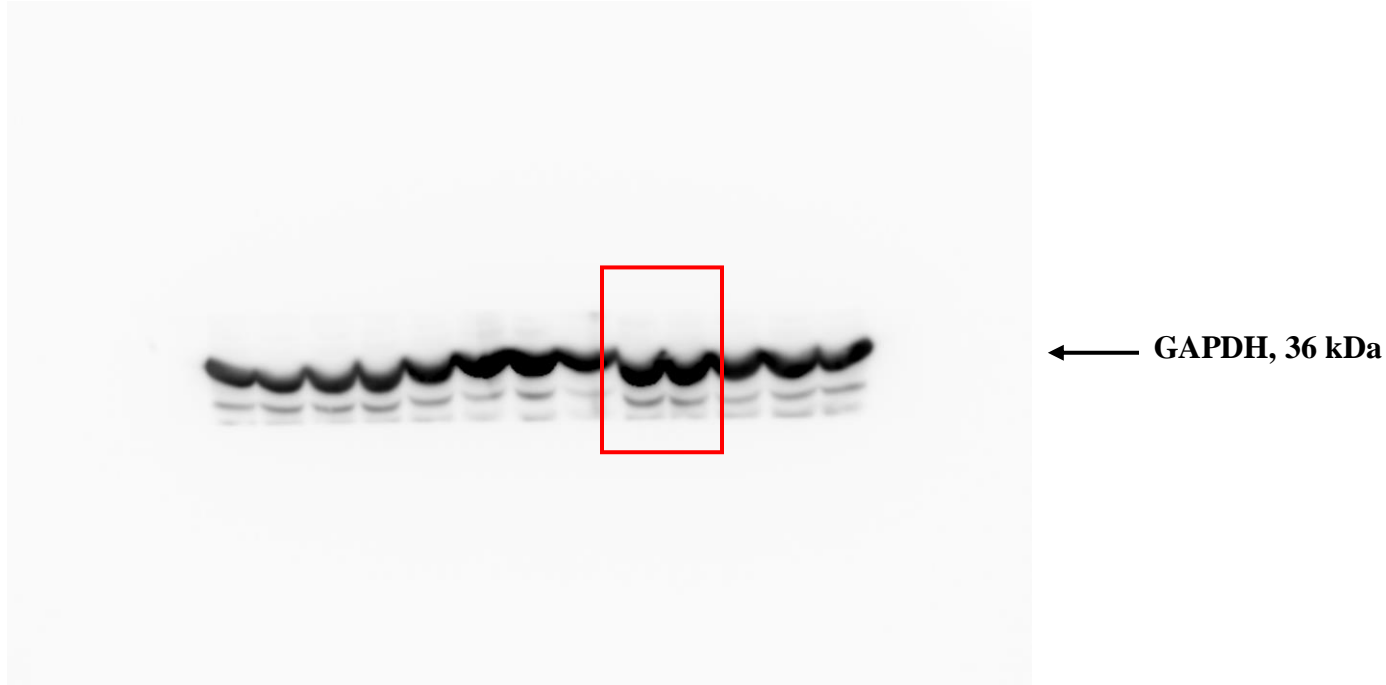

Supplement: fig4-data2 [file elife-88256-fig4-data2-v1.pdf]
