# Supplementary material for: PITAR, a DNA damage-inducible cancer/testis long noncoding RNA, inactivates p53 by binding and stabilizing TRIM28 mRNA
Source: eLife journal article supplement (doi:10.7554/elife.88256), 2023-07-03
Supplement: fig5-data2 [file elife-88256-fig5-data2-v1.pdf]

**Figure 5B:**

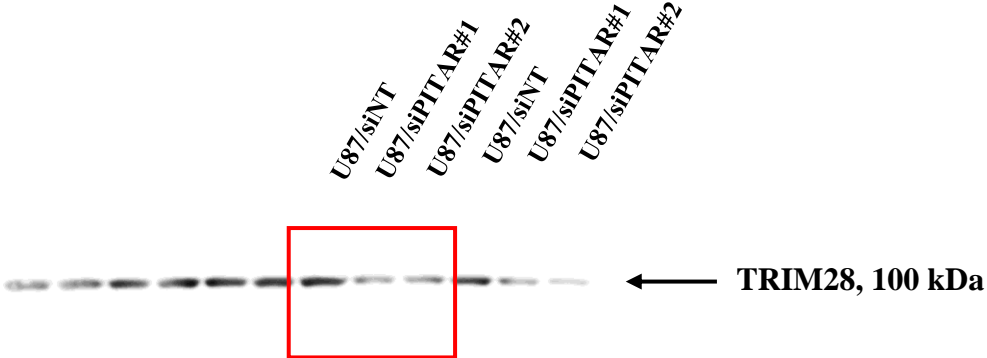

**Figure 5B:**

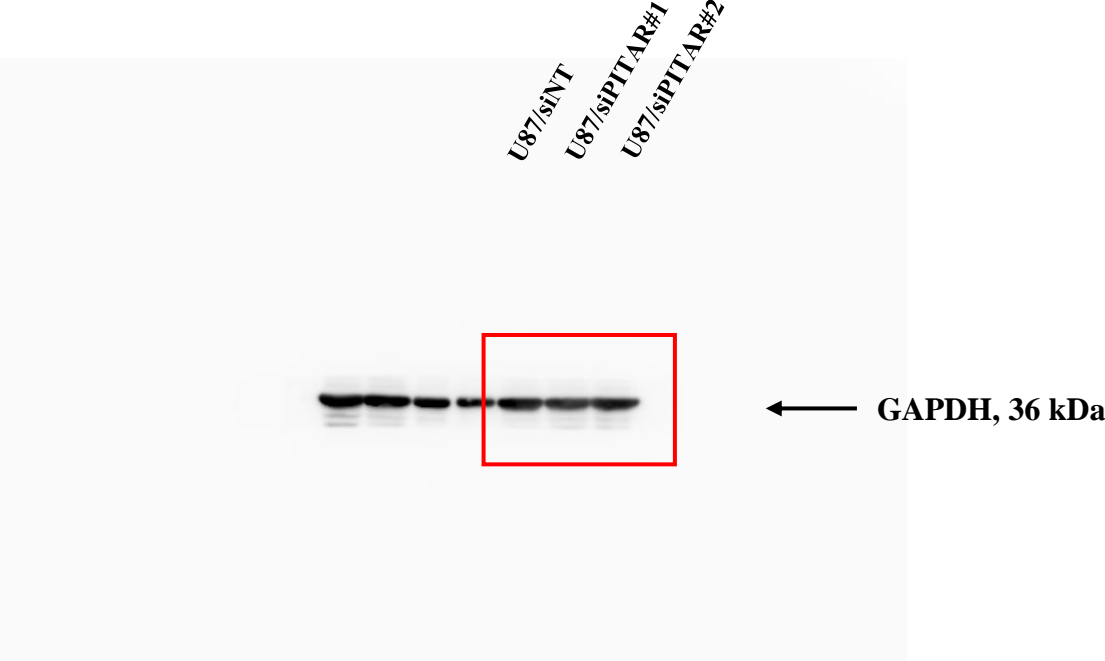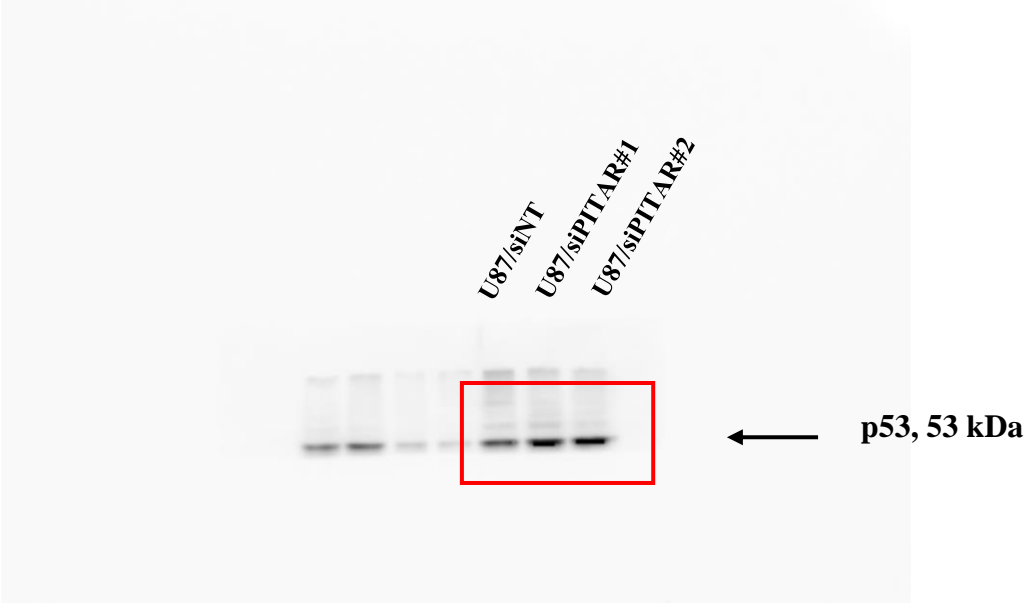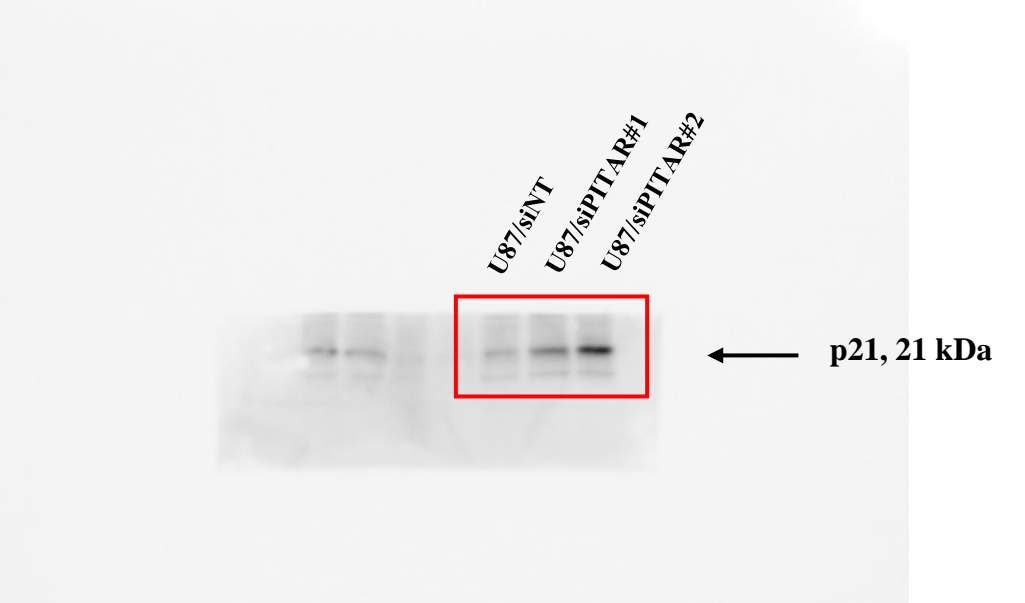

**Figure 5D:**

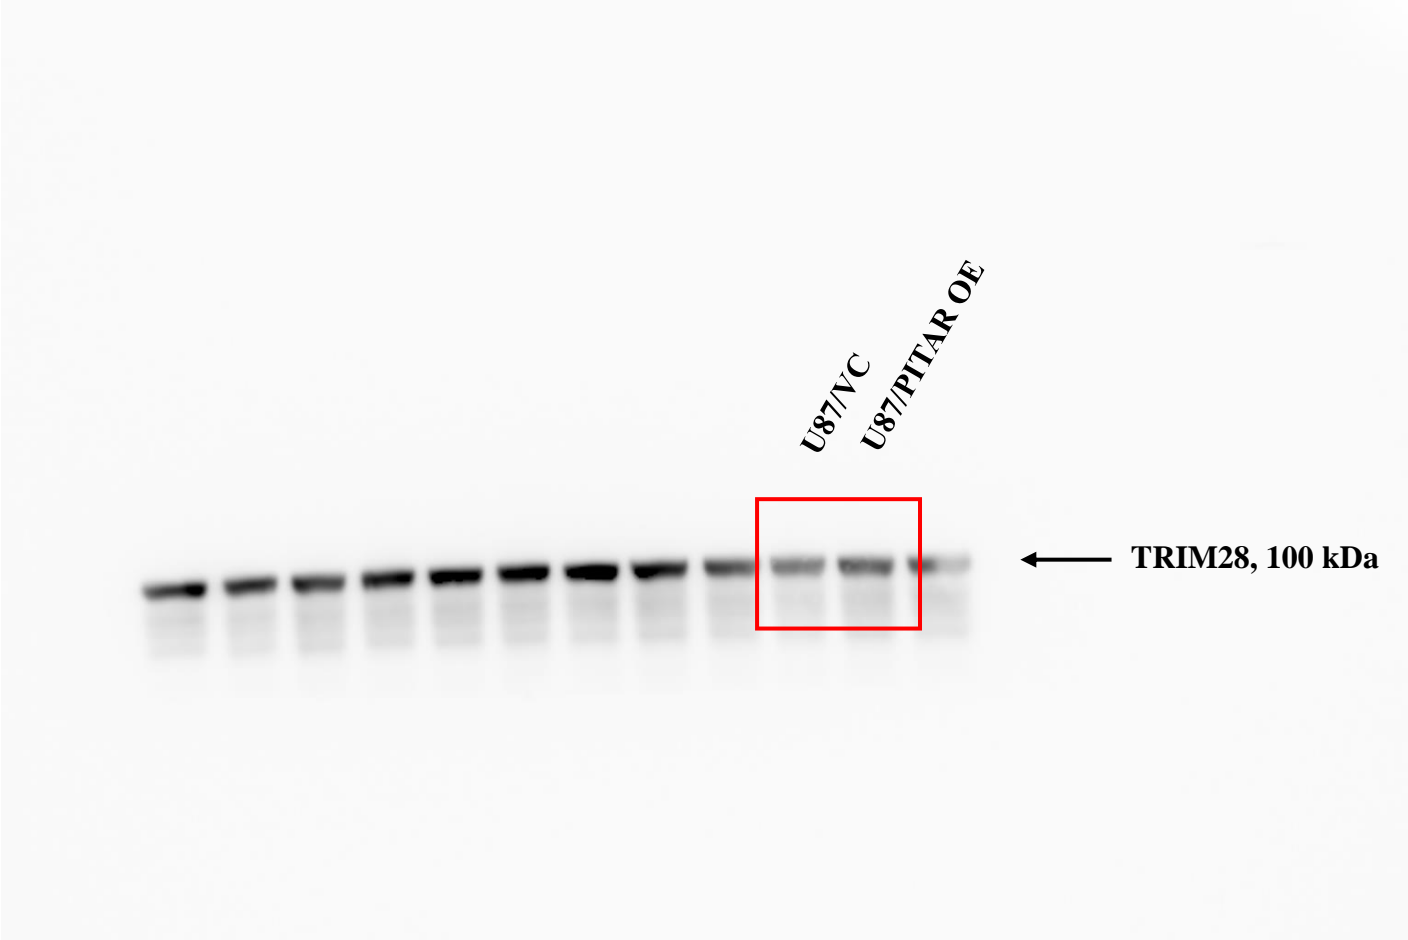

**Figure 5D:**

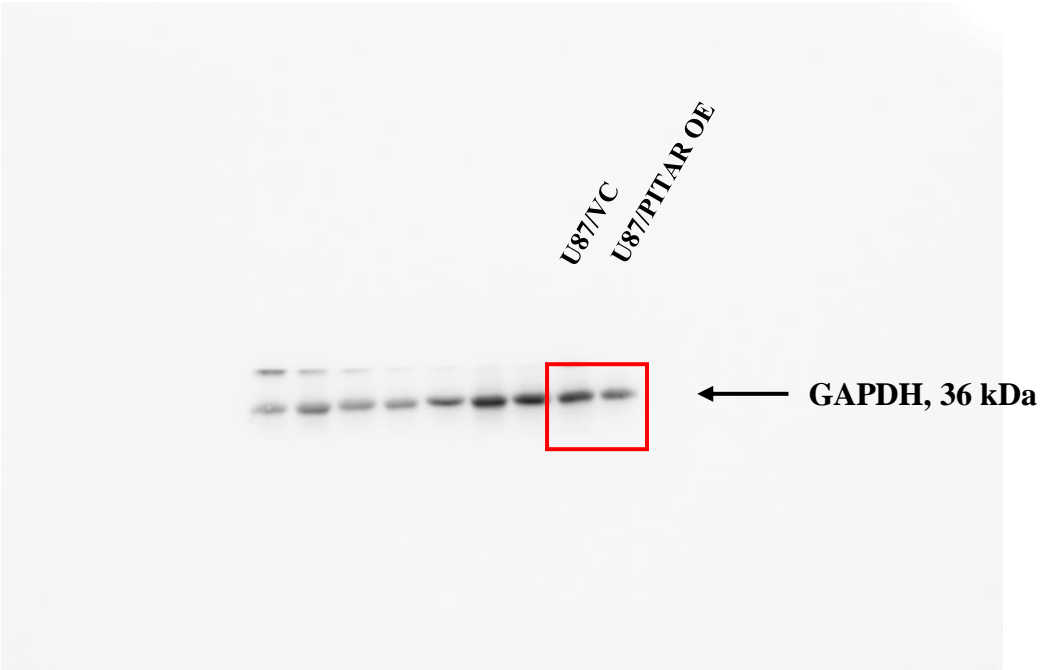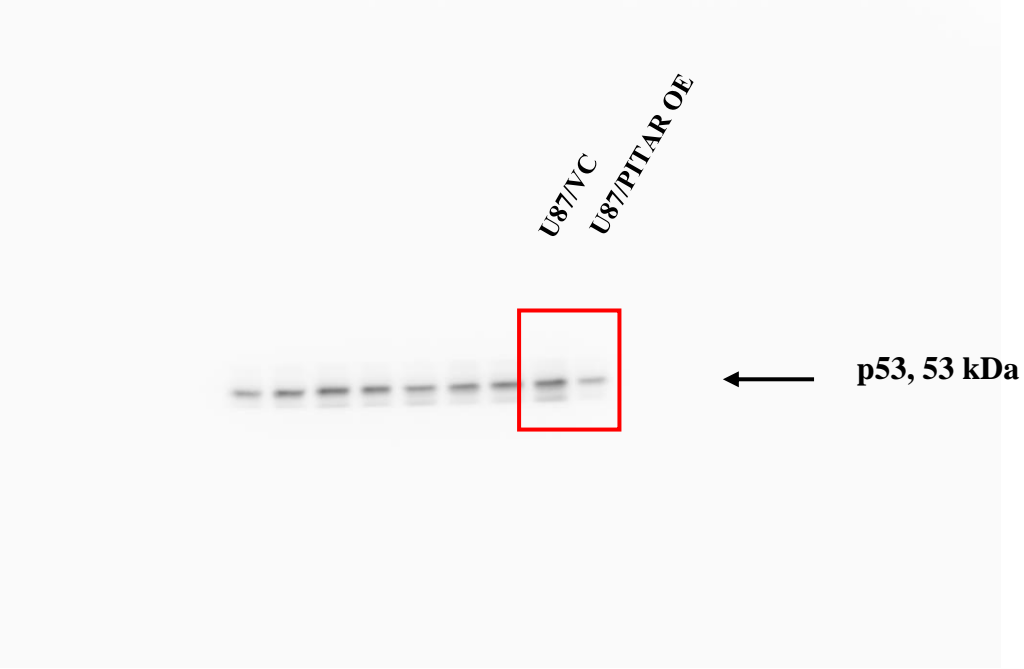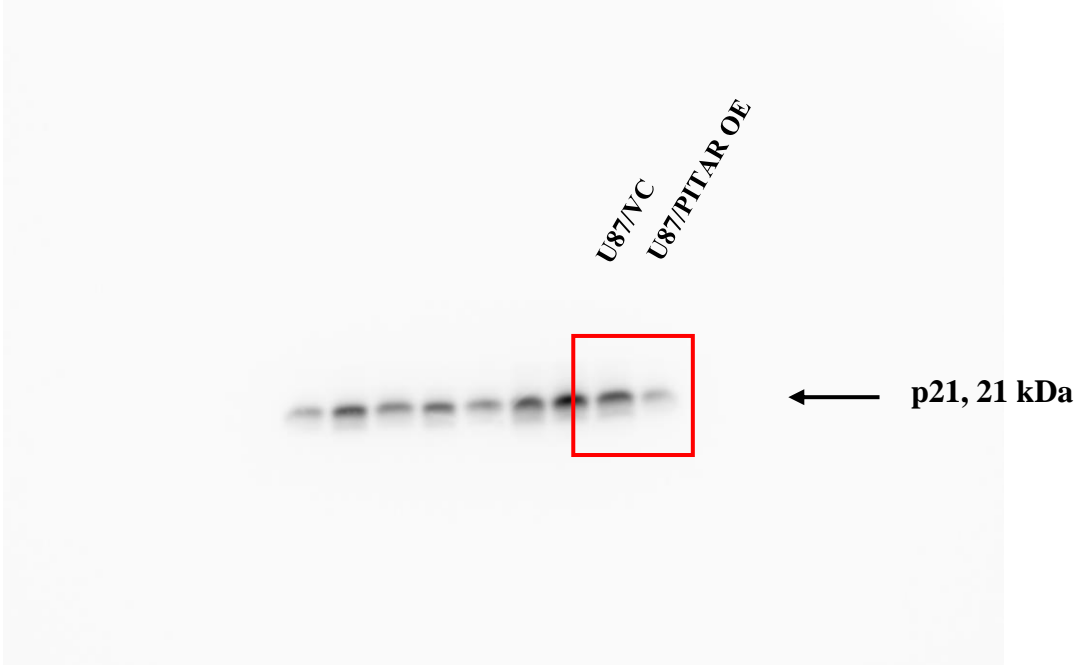

**Figure 5E:**

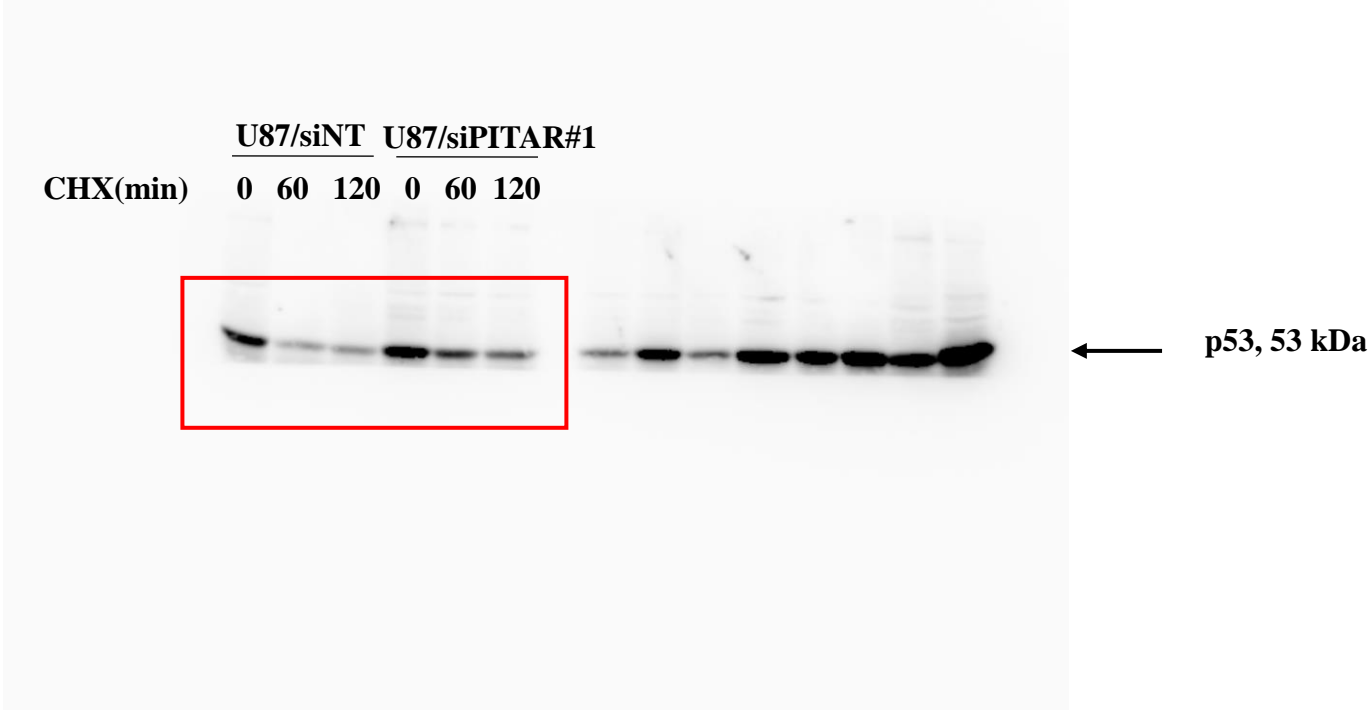

**Figure 5E:**

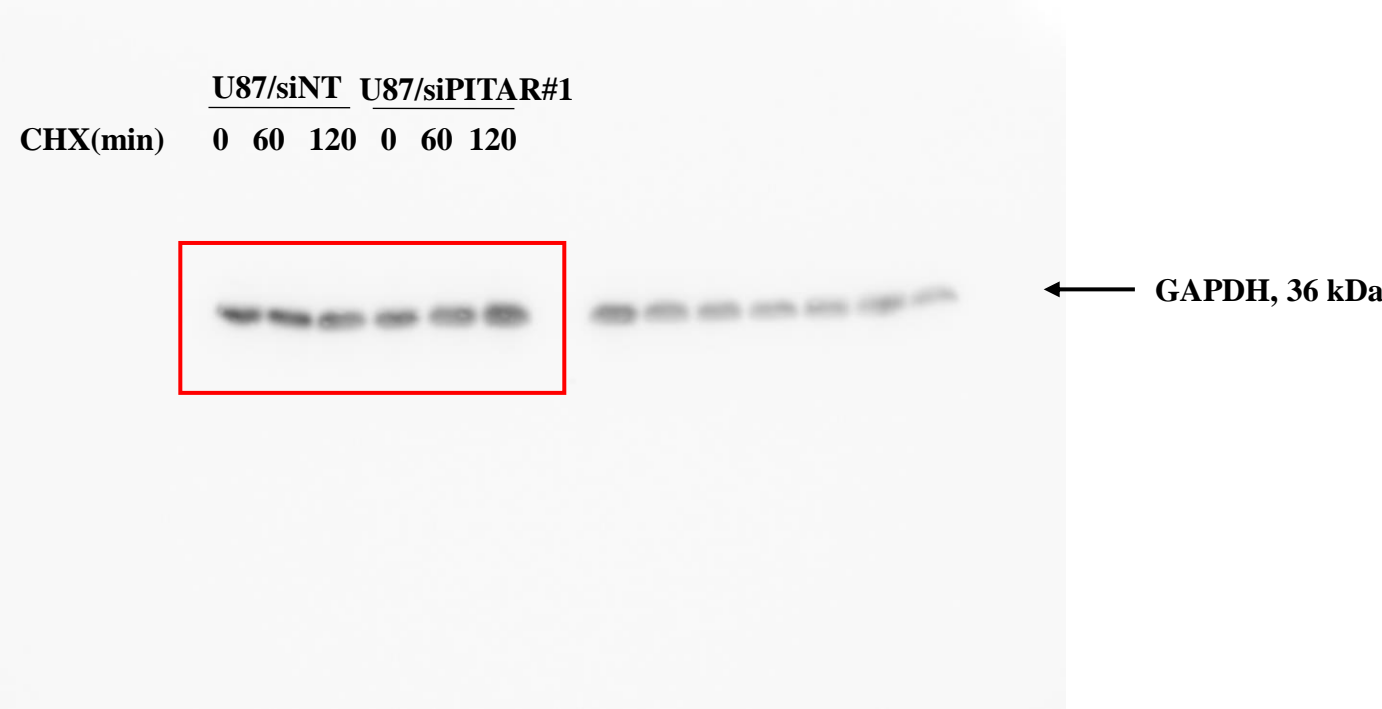

**Figure 5F:**

|              |   |   |   |   |
|--------------|---|---|---|---|
| U87/HA-Ub    | + | + | + | + |
| U87/VC       | + | - | + | - |
| U87/PITAR OE | - | + | - | + |
| MG132        | - | - | + | + |

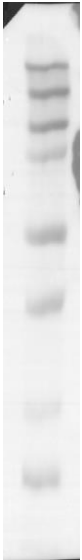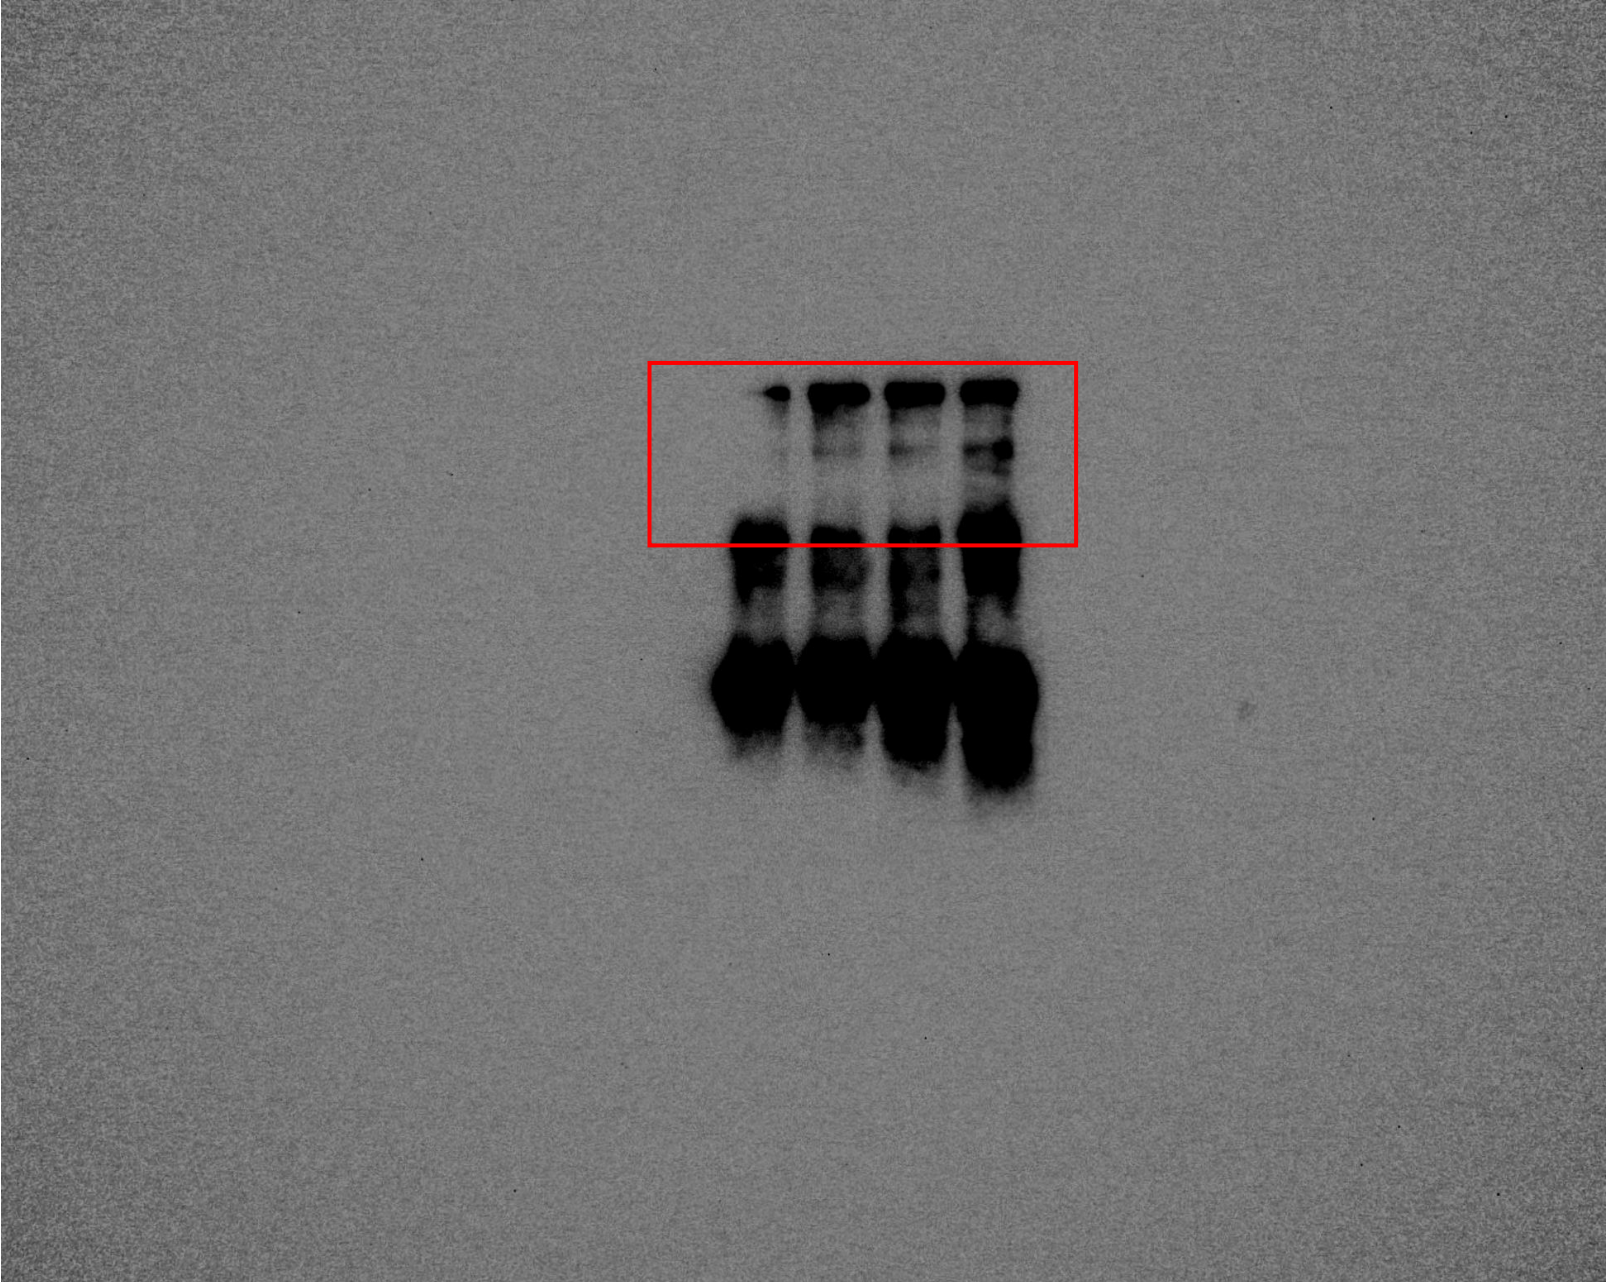

**Figure 5F:**

|              |   |   |   |   |
|--------------|---|---|---|---|
| U87/HA-Ub    | + | + | + | + |
| U87/VC       | + | - | + | - |
| U87/PITAR OE | - | + | - | + |
| MG132        | - | - | + | + |

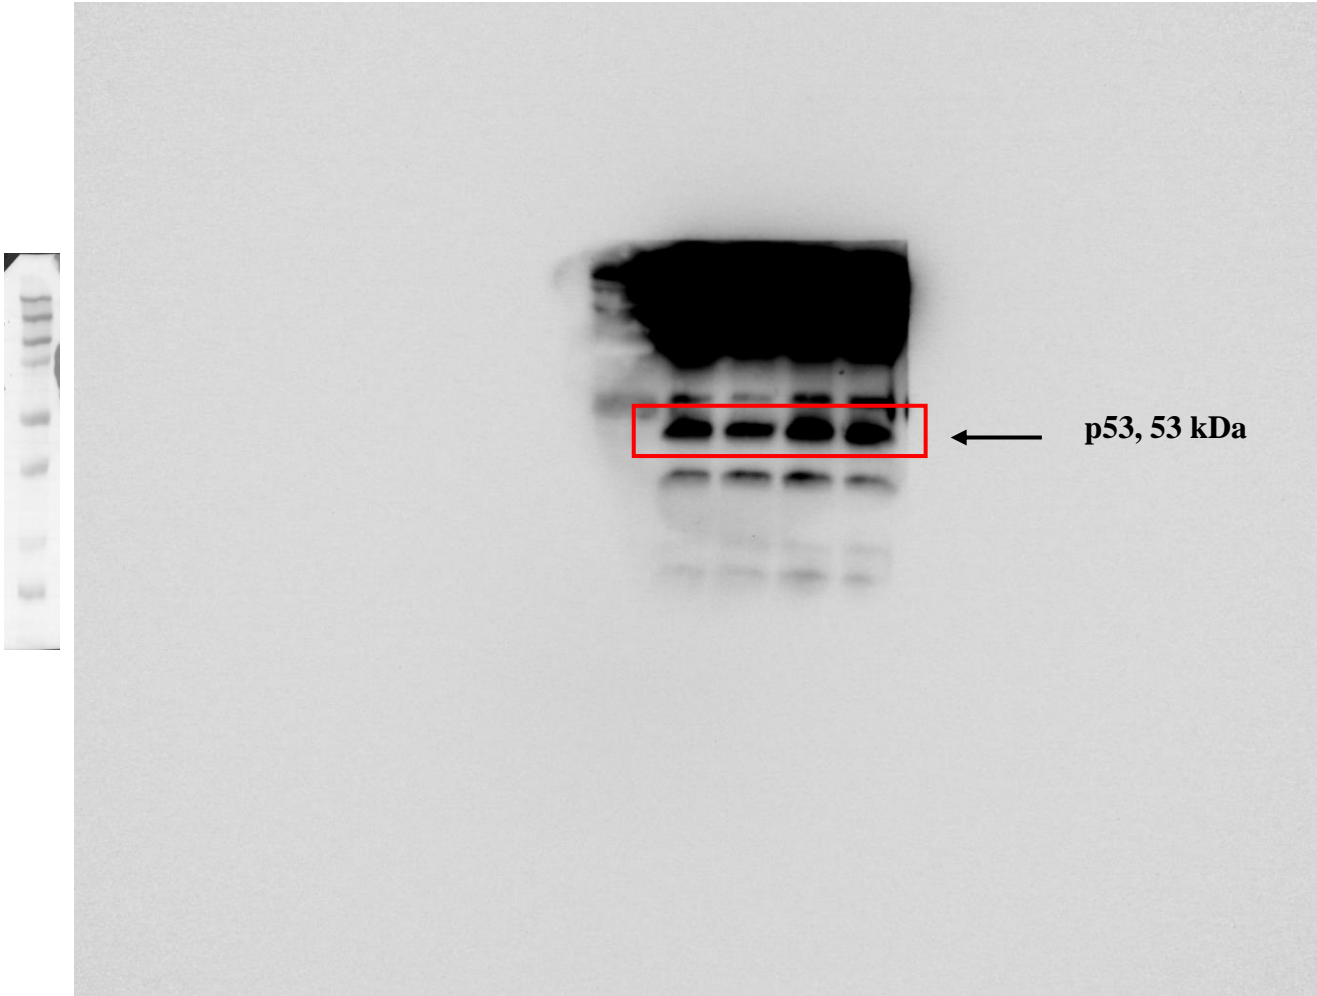



**Figure 5F:**

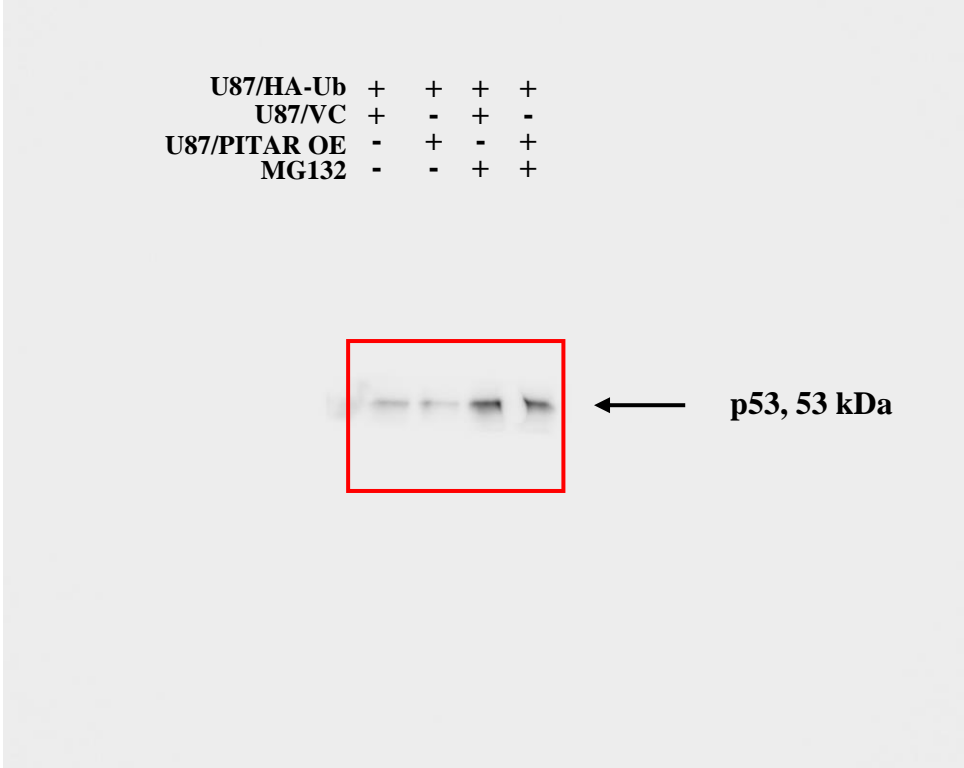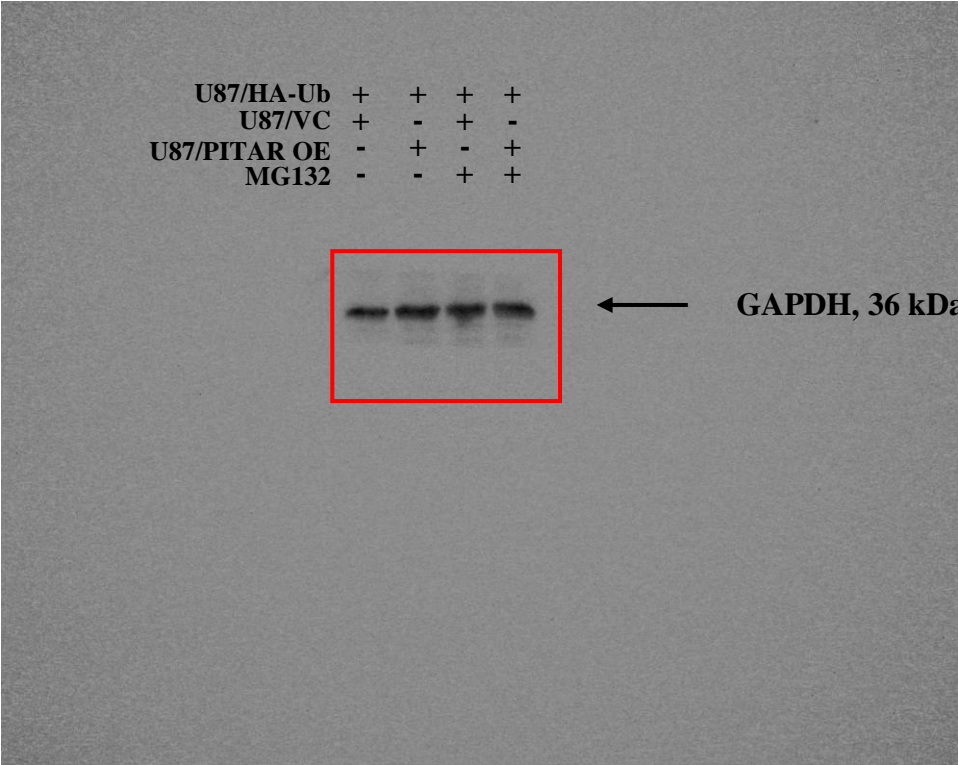

**Figure 5J:**

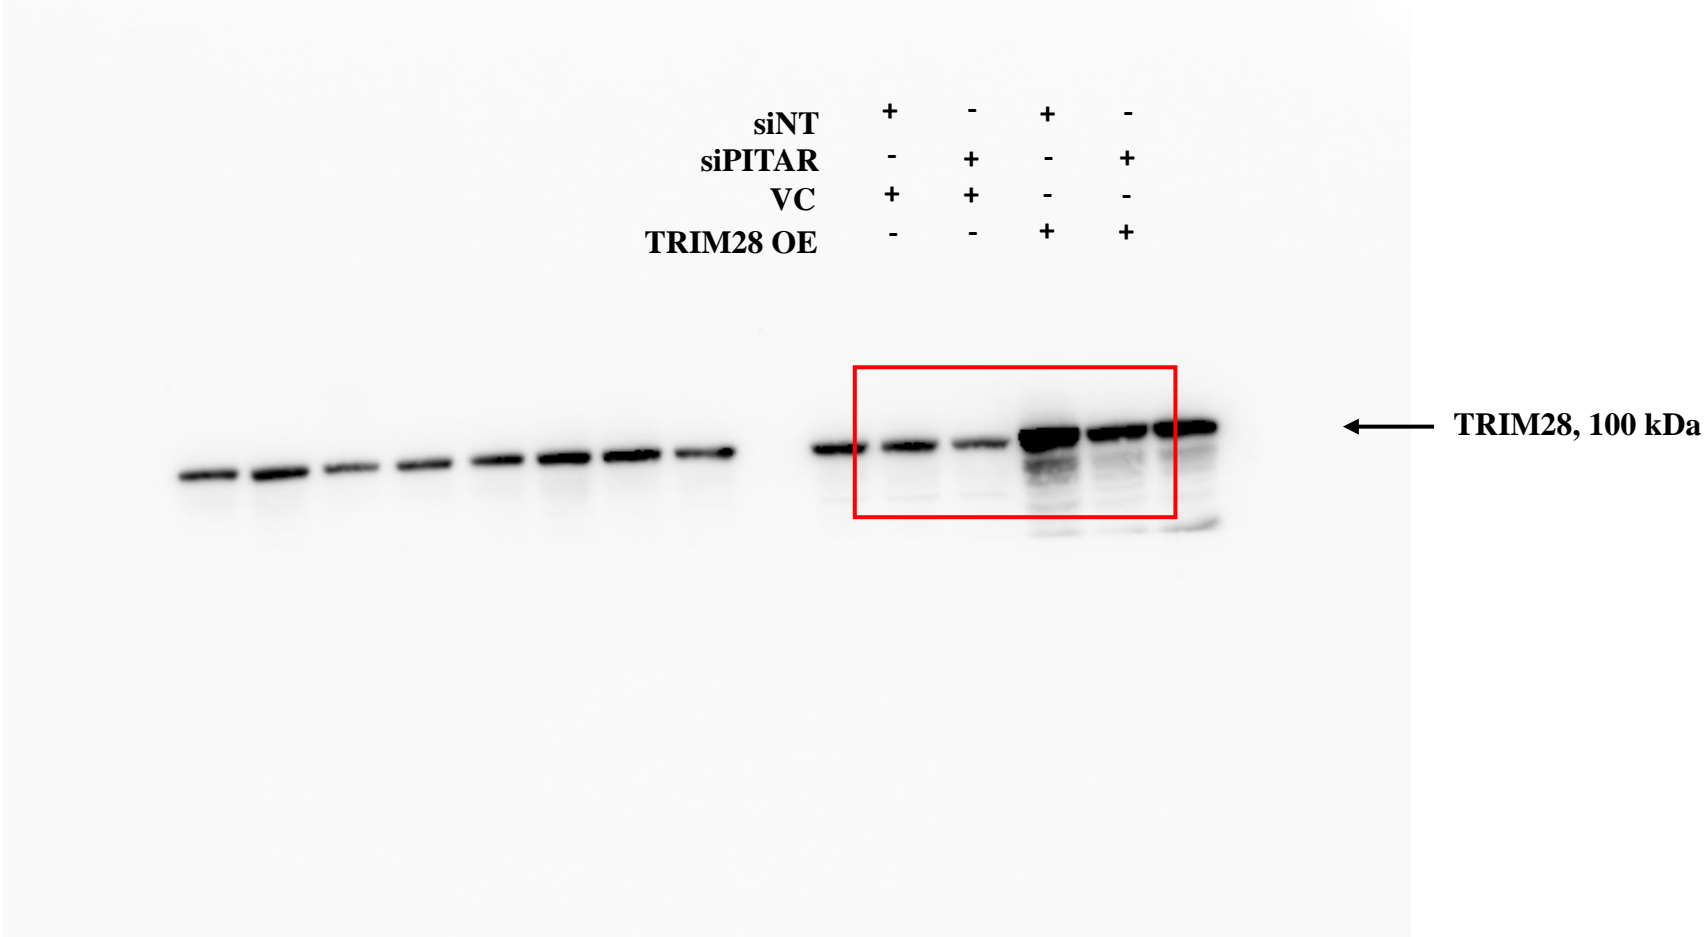

**Figure 5J:**

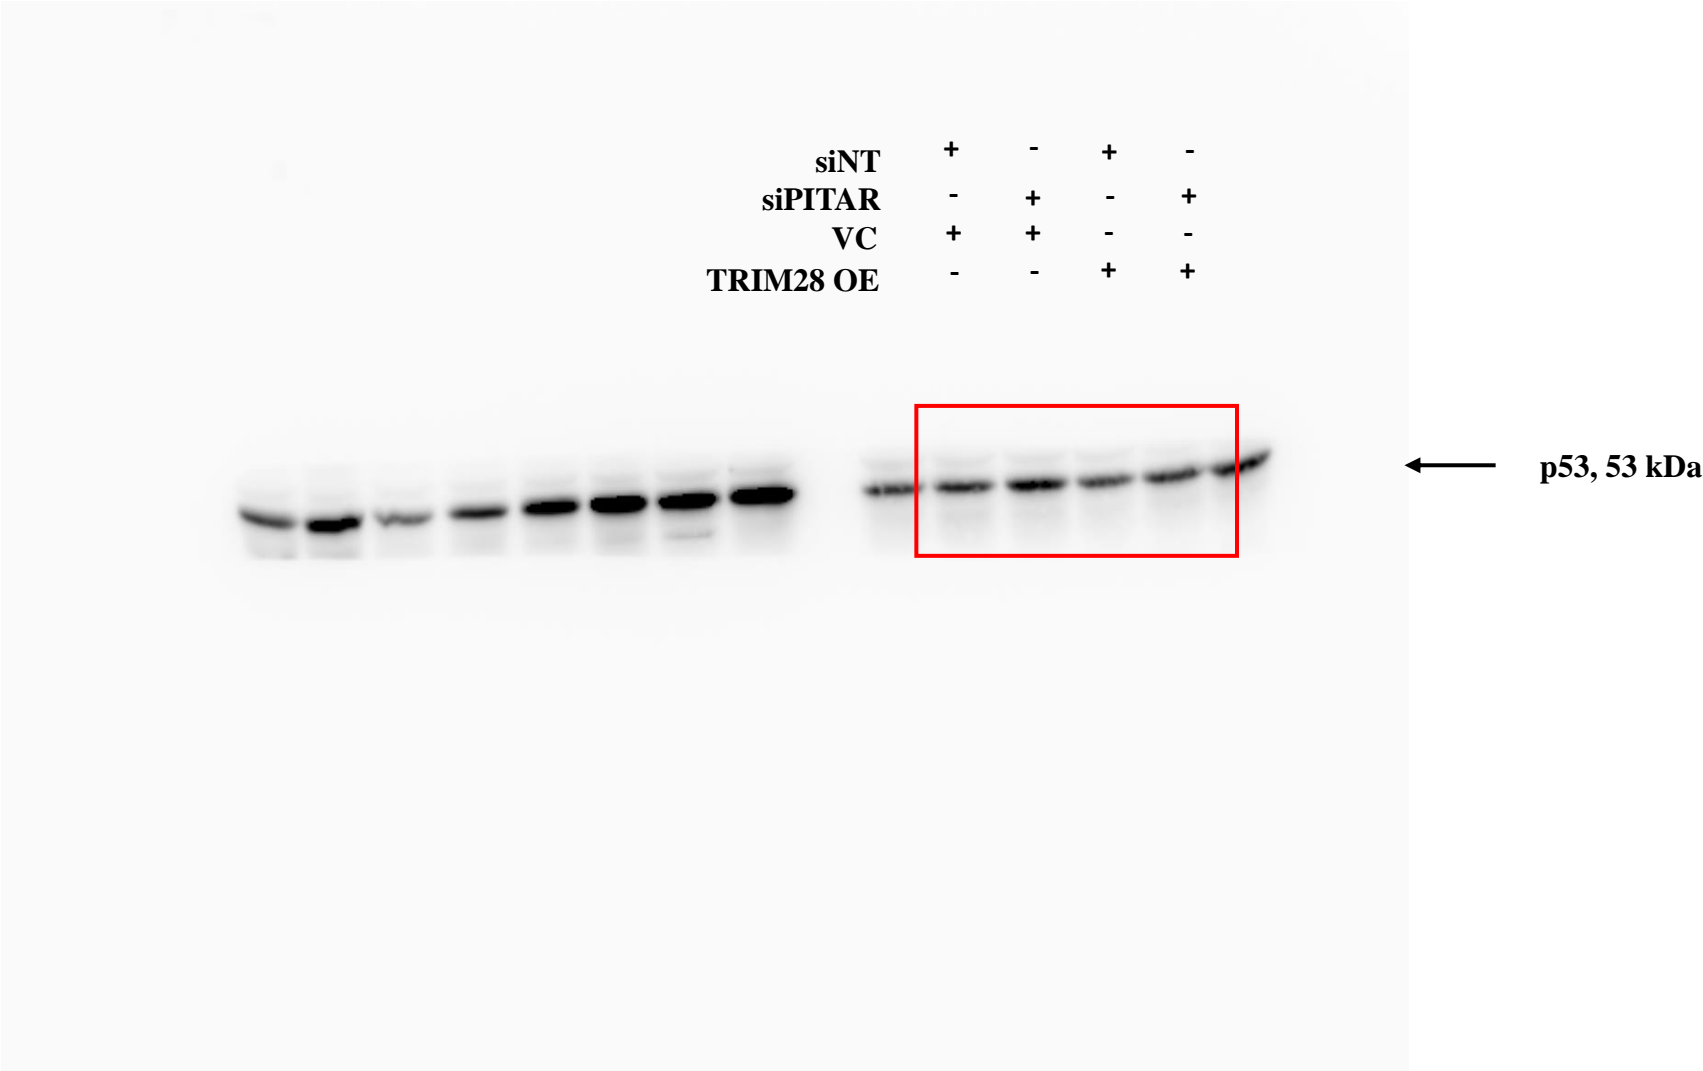

**Figure 5J:**

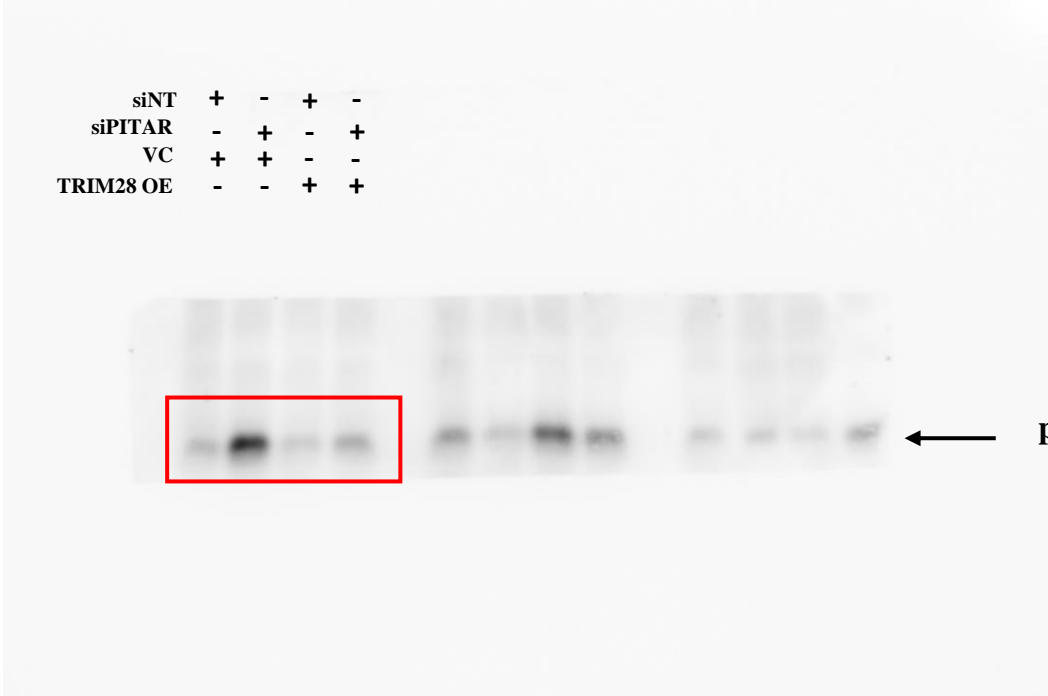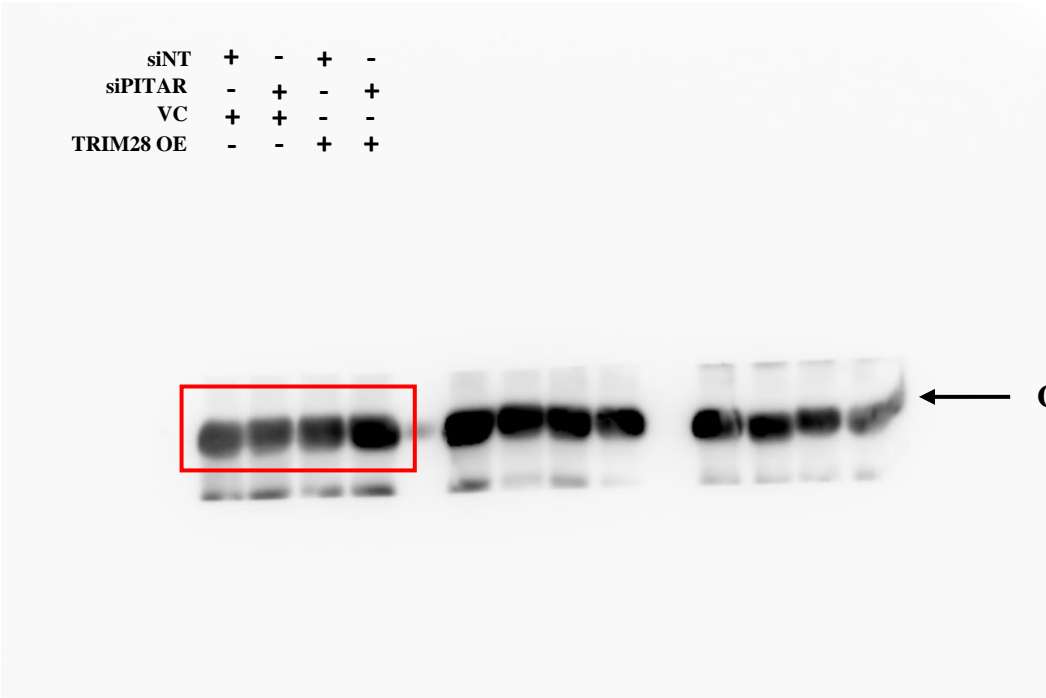

**Figure 5N:**

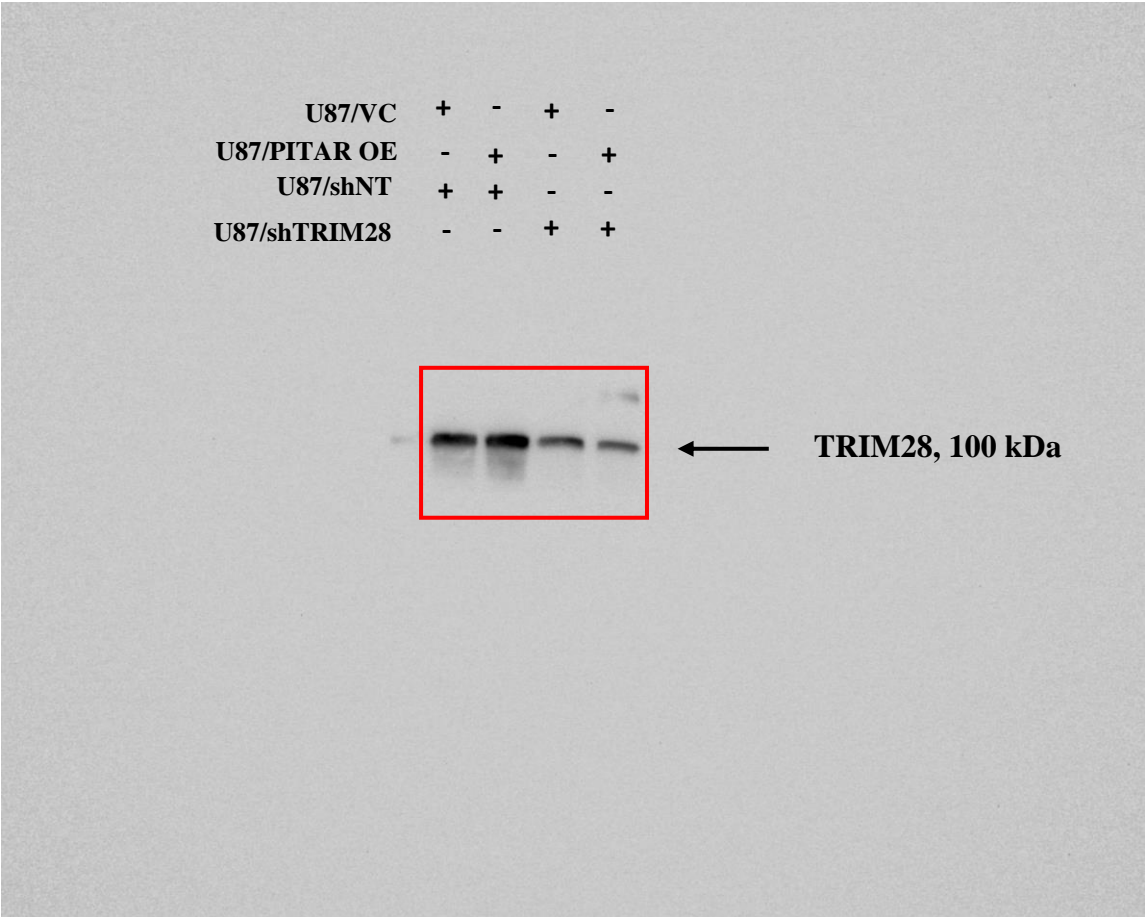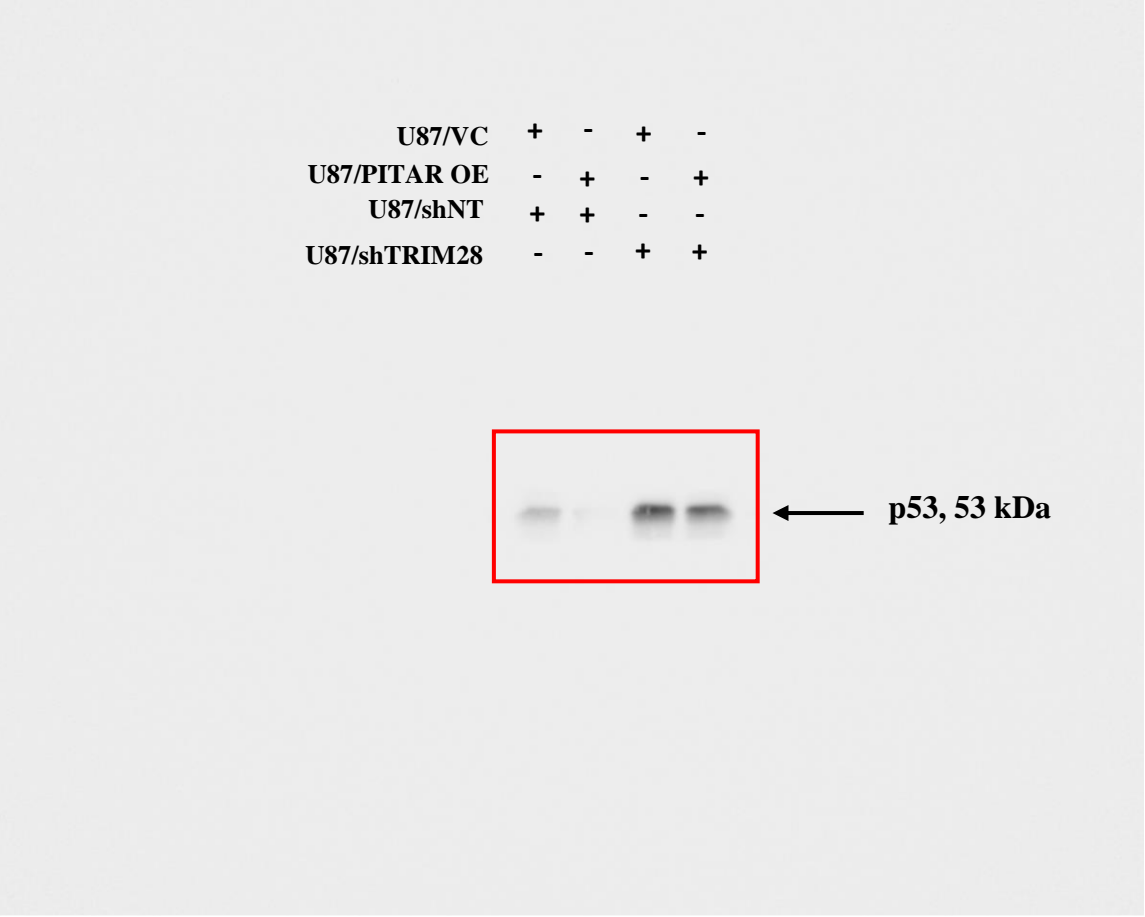

**Figure 5N:**

|              |   |   |   |   |
|--------------|---|---|---|---|
| U87/VC       | + | - | + | - |
| U87/PITAR OE | - | + | - | + |
| U87/shNT     | + | + | - | - |
| U87/shTRIM28 | - | - | + | + |

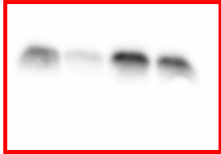

← p21, 21 kDa

|              |   |   |   |   |
|--------------|---|---|---|---|
| U87/VC       | + | - | + | - |
| U87/PITAR OE | - | + | - | + |
| U87/shNT     | + | + | - | - |
| U87/shTRIM28 | - | - | + | + |

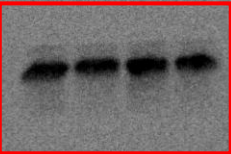

← GAPDH, 36 kDa
