# Supplementary material for: PITAR, a DNA damage-inducible cancer/testis long noncoding RNA, inactivates p53 by binding and stabilizing TRIM28 mRNA
Source: eLife journal article supplement (doi:10.7554/elife.88256), 2023-07-03

**Figure 5-figure supplement 1C:**

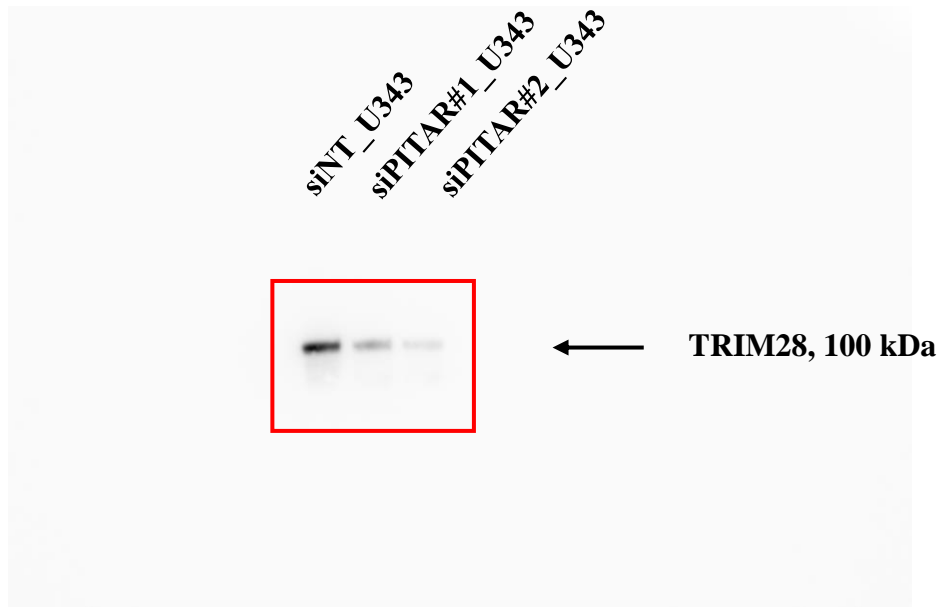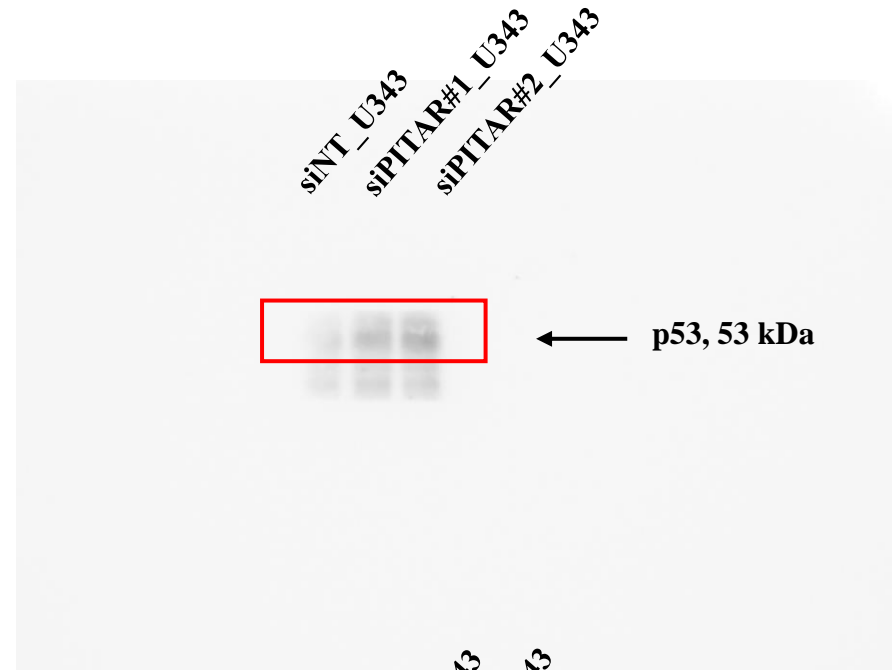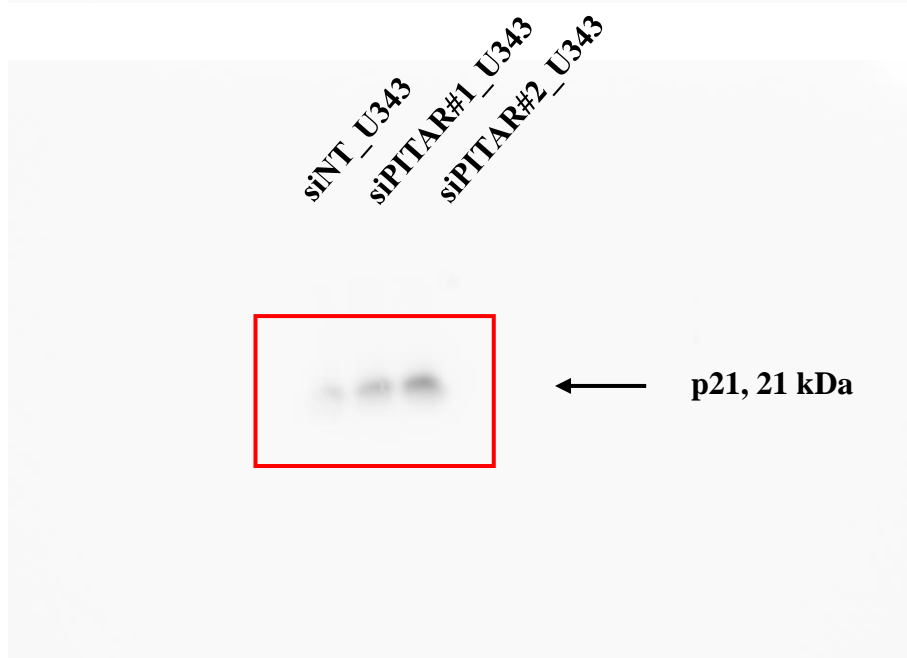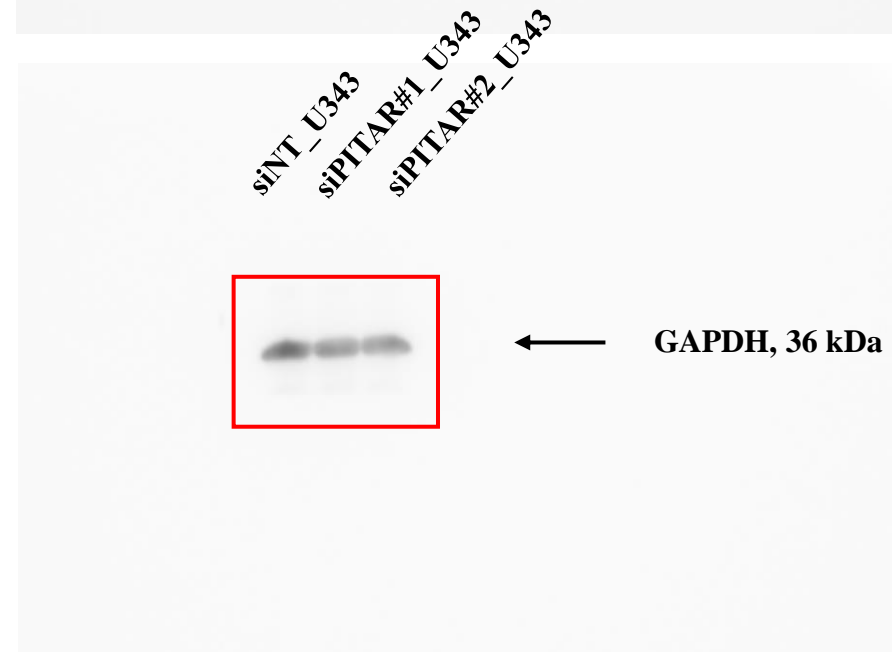

**Figure 5-figure supplement 1E:**

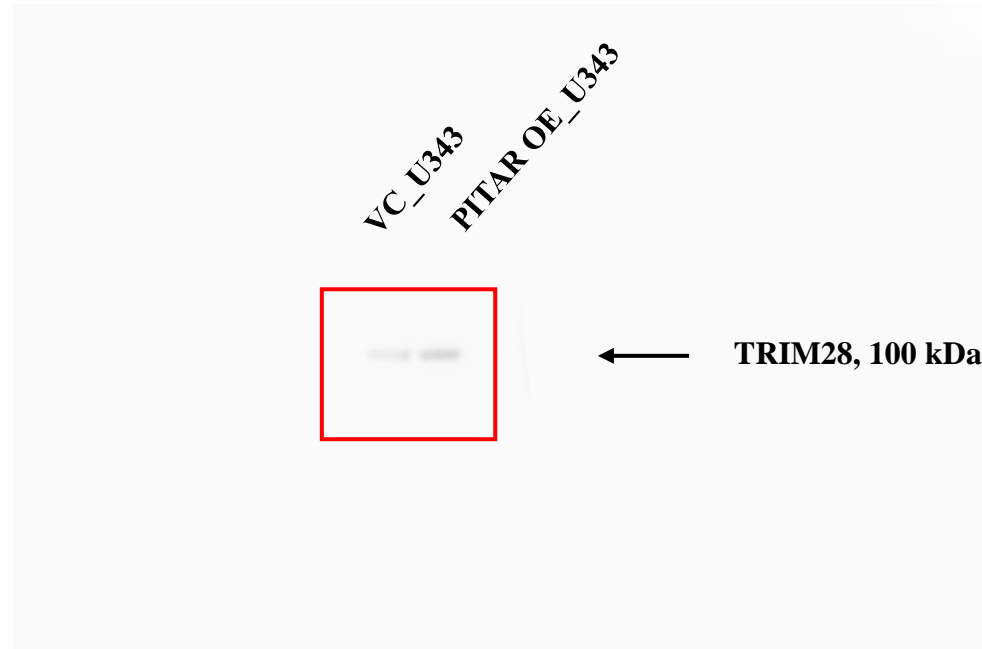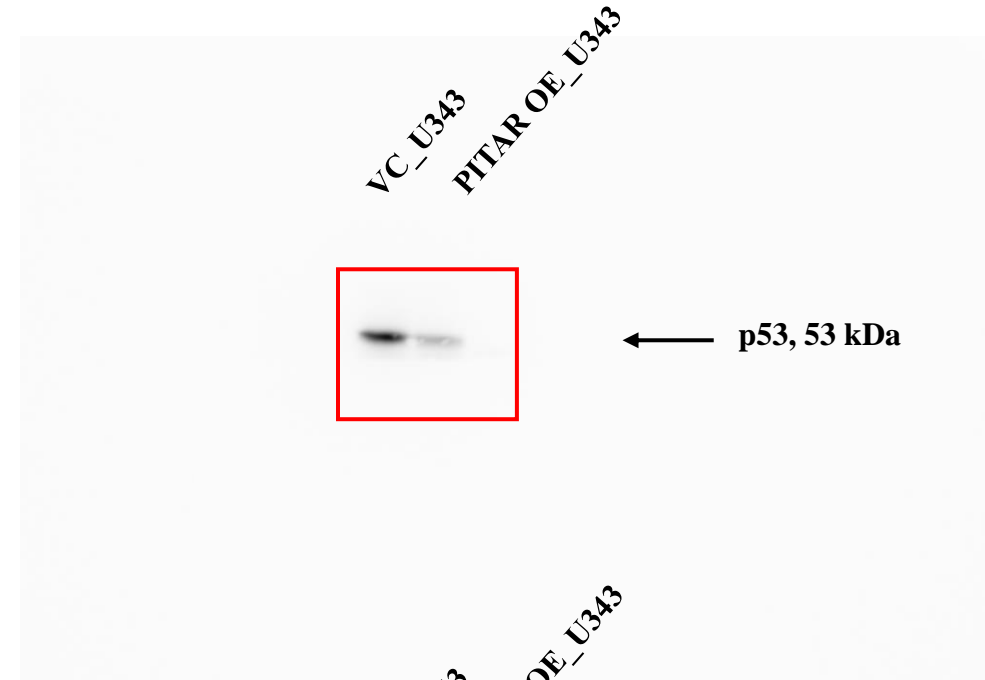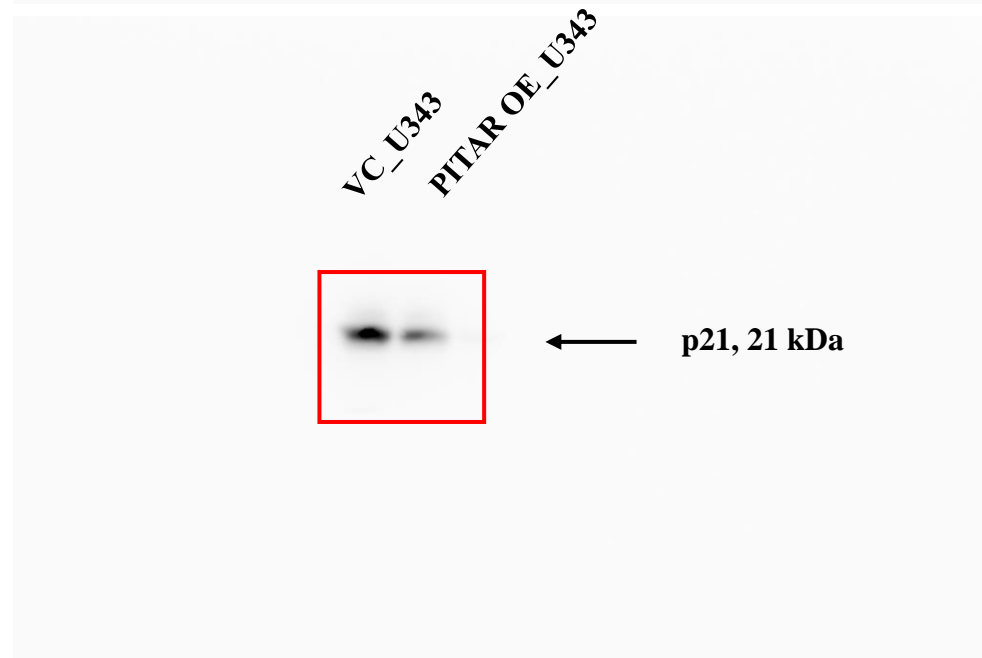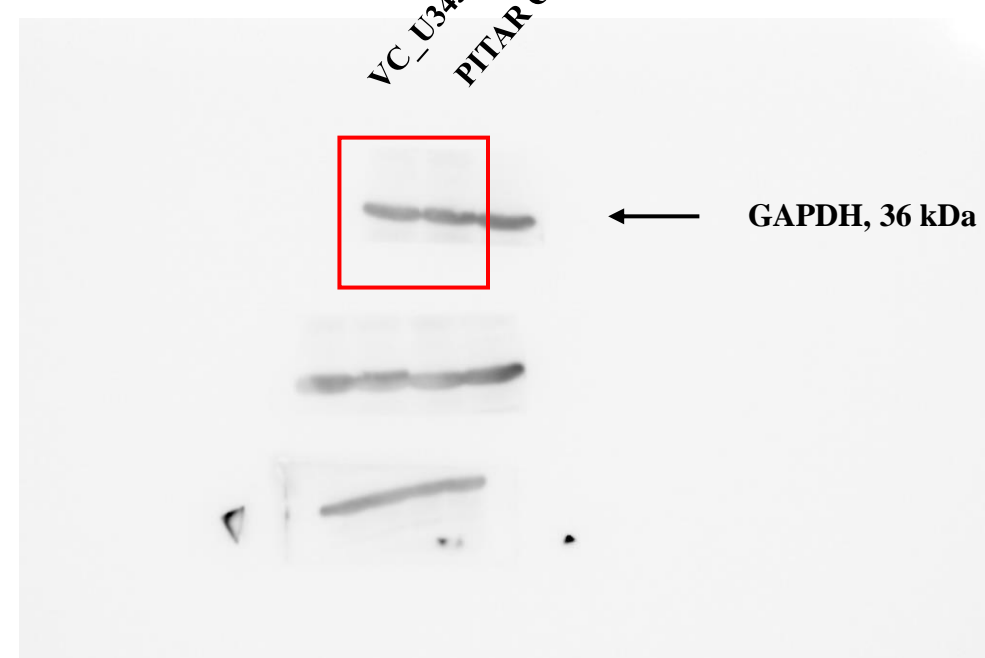

Supplement: fig5-figsupp1-data2 [file elife-88256-fig5-figsupp1-data2-v1.pdf]
